# Supplementary material for: Retrospective Analysis of Hematological Parameter Changes in DMARD-Naive Rheumatoid Arthritis Patients Treated with Methotrexate: Correlation with Disease Activity and Treatment Outcomes
Source: MDPI journal article supplement (doi:10.3390/biomedicines14030625), 2026-03-11
Supplement: s1 [file biomedicines-4188229-supplementary.pdf › biomedicines-4188229-supplementary.pdf]

Supplementary Table 1: Baseline demographic, clinic and laboratory parameters of seropositive and seronegative RA patients

| Variable                                     | Seropositive RA (n=217)          | Seronegative RA (n=82)           | p     |
|----------------------------------------------|----------------------------------|----------------------------------|-------|
| Age (years) (median,IQR)                     | 57 (47-64)                       | 56 (48-65)                       | 0.931 |
| Gender (n,%)                                 | 153 (70%) female<br>64 (30%)male | 59 (71%) female<br>23 (29%) male | 0.463 |
| Symptom duration (years) (median,IQR)        | 0.5 (0.3-1)                      | 0.5 (0.2-1)                      | 0.003 |
| TJC (median,IQR)                             | 4 (3-6)                          | 4 (2-6)                          | 0.067 |
| SJC (median,IQR)                             | 3 (2-5)                          | 3 (2-5)                          | 0.896 |
| VAS (median,IQR)                             | 6 (5-6.75)                       | 6 (6-6)                          | 0.574 |
| CRP (mg/dL) (median,IQR)                     | 1.87±0.7<br>1 (0.7-1.9)          | 2.24±2.45<br>1.3 (0.7-2.8)       | 0.182 |
| DAS28-CRP                                    | 3.59 (3.24-4.07)                 | 3.58 (3.16-4.09)                 | 0.793 |
| Remission (n,%)                              | 36 (16.5%)                       | 19 (23.1%)                       | 0.217 |
| LDA (n,%) (median,IQR)                       | 124 (57.1%)                      | 44 (53.6%)                       | 0.111 |
| WBC (cells/ $\mu$ L), (Median, IQR)          | 8320 (6792.5-9827.5)             | 8190 (6715-10812.5)              | 0.364 |
| NEU (cells/ $\mu$ L), (Median, IQR)          | 5250 (3175-6445)                 | 5095 (3767.5-6717.5)             | 0.523 |
| LYM (cells/ $\mu$ L), (Median, IQR)          | 2175 (1615-2617.5)               | 2260 (1852.5-2750)               | 0.179 |
| NLR (Median, IQR)                            | 2.37 (1.77-2.95)                 | 2.08 (1.69-3.32)                 | 0.602 |
| MONO (cells/ $\mu$ L), (Median, IQR)         | 590 (470-720)                    | 610 (492.5-797.5)                | 0.179 |
| HGB (g/dl) (Median, IQR)                     | 13 (11.9-13.97)                  | 12.65 (11.7-13.67)               | 0.219 |
| PLT ( $10^3$ cells / $\mu$ L), (Median, IQR) | 288.5 (242.25-347.75)            | 300 (239.75-359.75)              | 0.415 |
| PLR (Median, IQR)                            | 141.17 (108.7-171.88)            | 135.64 (102.91-172.13)           | 0.517 |
| MPV (fL), (Median, IQR)                      | 10.3 (9.7-10.8)                  | 10 (9.4-10.7)                    | 0.074 |
| RDW (%) (Median, IQR)                        | 13.6 (12.9-14.7)                 | 13.6 (13.1-15)                   | 0.375 |

RA; rheumatoid arthritis, TJC; tender joint count, SJC;swollen joint count, VAS; visual analogue scale, DAS28; disease activity score 28, CRP; C reactive protein, LDA; low disease activity, WBC; White blood cell count, NEU; neutrophil, LYM; lymphocyte, NLR: neutrophil/ lymphocyte ratio, MONO; monocyte, HGB; hemoglobin, PLT; platelet, PLR; platelet/lymphocyte ratio, MPV; mean platelet volume, RDW; red cell distribution width, IQR; interquartile range. p values<0.05 were considered statistically significant.

Supplementary Table 2: Hematological parameters changes at week 12 in seropositive and seronegative RA patients

| Variable                                           | Seropositive RA (n=217) | Seronegative RA (n=82) | p     |
|----------------------------------------------------|-------------------------|------------------------|-------|
| WBC change (cells/ $\mu$ L), (Median, IQR)         | 0 (-795-1332.5)         | 0 (-817.5-1280)        | 0.884 |
| NEU change (cells/ $\mu$ L), (Median, IQR)         | 0 (-647.5-1067.5)       | 0 (-695-902.5)         | 0.887 |
| LYM change (cells/ $\mu$ L), (Median, IQR)         | 0 (-230-330)            | 0 (-297.5-210)         | 0.137 |
| NLR change (Median, IQR)                           | 0 (-0.37-0.49)          | 0.08 (-0.21-0.61)      | 0.114 |
| MONO change (cells/ $\mu$ L), (Median, IQR)        | 0 (-100-107.5)          | 0 (-97.5-90)           | 0.580 |
| HGB change (g/dl) (Median, IQR)                    | 0 (-0.7-0.3)            | 0 (-0.57-0.2)          | 0.812 |
| PLT change ( $10^3$ cells/ $\mu$ L), (Median, IQR) | 13500 (-16750-70750)    | 19500 (-12750-82250)   | 0.600 |
| PLR change (Median, IQR)                           | 0 (-21.07-23.67)        | 7.2 (-4.19-37.7)       | 0.072 |
| MPV change (fL), (Median, IQR)                     | 0 (-0.3-0.3)            | 0 (-0.3-0.27)          | 0.894 |
| RDW change (%) (Median, IQR)                       | -0.7 (-1.37-0)          | -0.8 (-1.47-0)         | 0.257 |

|                                 |                  |                               |       |
|---------------------------------|------------------|-------------------------------|-------|
| CRP change (mg/dL) (median,IQR) | 0.6 (0.1-1.37)   | 0.7 (0-1.75)                  | 0.918 |
| DAS28-CRP change (Median, IQR)  | 0.54 (0.34-0.81) | 0.53 (0.32-0.75)<br>1.37±2.35 | 0.744 |

*RA; rheumatoid arthritis, TJC; tender joint count, SJC;swollen joint count, VAS; visual analogue scale, DAS28; disease activity score 28, CRP; C reactive protein, LDA; low disease activity, WBC; White blood cell count, NEU: neutrophil, LYM; lymphocyte, NLR: neutrophil/ lymphocyte ratio, MONO; monocyte, HGB; hemoglobin, PLT: platelet, PLR; platelet/lymphocyte ratio, MPV; mean platelet volume, RDW; red cell distribution width, IQR; interquartile range. p values<0.05 were considered statistically significant.*

Supplementary Table 3: Collinearity diagnostics for multivariate logistic regression models

| Variable         | Tolerance | VIF   |
|------------------|-----------|-------|
| Age              | 0.891     | 1.122 |
| Symptom duration | 0.934     | 1.071 |
| Seropositivity   | 0.912     | 1.096 |
| TJC              | 0.672     | 1.489 |
| SJC              | 0.654     | 1.529 |
| CRP              | 0.693     | 1.443 |
| DAS28-CRP        | 0.581     | 1.721 |

*VIF; Variance Inflation Factor, TJC; tender joint count, SJC;swollen joint count, CRP; C reactive protein DAS28; disease activity score 28.*

Supplementary Table 4: Linear regression analysis of hematological parameter changes as predictors of DAS28-CRP improvement

| Variable | Unstandardized Coefficients | Std error | Standardized Coefficient | t      | p     | 95%CI           |
|----------|-----------------------------|-----------|--------------------------|--------|-------|-----------------|
| ΔWBC     | 2.015E-05                   | 0.000     | 0.073                    | 1.149  | 0.252 | 0.000-0.000     |
| ΔNEU     | 1.454E-05                   | 0.000     | 0.044                    | 0.588  | 0.557 | 0.000-0.000     |
| ΔLYM     | -0.00024                    | 0.00007   | -0.240                   | -3.423 | 0.001 | -0.00038—0.0001 |
| ΔNLR     | -0.058                      | 0.030     | -5.609                   | -1.947 | 0.052 | -0.117-0.001    |
| ΔMONO    | -8.761E-05                  | 0.000     | -0.055                   | -0.830 | 0.407 | 0.000-0.000     |
| ΔHGB     | -0.007                      | 0.017     | -0.025                   | -0.416 | 0.677 | -0.042-0.028    |
| ΔPLT     | -3.138E-08                  | 0.000     | -0.011                   | -0.190 | 0.849 | 0.000-0.000     |
| ΔPLR     | 0.001                       | 0.001     | 5.511                    | 1.916  | 0.056 | 0.000-0.002     |
| ΔMPV     | 0.001                       | 0.002     | 0.04                     | 0.701  | 0.484 | -0.000-3-0.005  |
| ΔRDW     | -0.004                      | 0.002     | -0.159                   | -2.788 | 0.006 | -0.008—0.001    |

*DAS28; disease activity score 28, WBC; White blood cell count, NEU; neutrophil, LYM; lymphocyte, NLR: neutrophil/ lymphocyte ratio, MONO; monocyte, HGB; hemoglobin, PLT; platelet, PLR; platelet/lymphocyte ratio, MPV; mean platelet volume, RDW; red cell distribution width, CI; confidence Interval. p values<0.05 were considered statistically significant.*

R:0.295, R<sup>2</sup>:0.087, adjusted R<sup>2</sup>:0.055, standard error of the estimate: 0.32076

F(10, 289)= 2.756, p:0.003

Supplementary Table 5: Linear regression analysis of hematological parameter changes as predictors of CRP improvement

| Variable | Unstandardized Coefficients | Std error | Standardized Coefficient | t      | p     | 95%CI               |
|----------|-----------------------------|-----------|--------------------------|--------|-------|---------------------|
| ΔWBC     | 2.262E-05                   | 0.0001    | 0.023                    | 0.204  | 0.838 | 0.000-0.0002        |
| ΔNEU     | 0.0002                      | 0.0001    | 0.200                    | 1.603  | 0.110 | 0.000-0.0004        |
| ΔLYM     | -0.001                      | 0.0004    | -0.171                   | -2.436 | 0.015 | -0.0018-<br>-0.0002 |
| ΔNLR     | -0.284                      | 0.188     | -4.356                   | -1.511 | 0.132 | -0.655-<br>0.086    |
| ΔMONO    | 0.0002                      | 0.001     | 0.012                    | 0.177  | 0.860 | -0.001-<br>0.002    |
| ΔHGB     | -0.222                      | 0.110     | -0.121                   | -2.022 | 0.044 | -0.439- -<br>0.006  |
| ΔPLT     | 8.959E-07                   | 0.000     | 0.052                    | 0.860  | 0.390 | 0.000-<br>0.000     |
| ΔPLR     | 0.005                       | 0.004     | 4.298                    | 1.492  | 0.137 | -0.002-<br>0.012    |
| ΔMPV     | 0.011                       | 0.011     | 0.054                    | 0.937  | 0.349 | -0.012-<br>0.033    |
| ΔRDW     | -0.014                      | 0.010     | -0.080                   | -1.409 | 0.160 | -0.034-<br>0.006    |

CRP; C reactive protein, WBC; White blood cell count, NEU; neutrophil, LYM; lymphocyte, NLR: neutrophil/ lymphocyte ratio, MONO; monocyte, HGB; hemoglobin, PLT; platelet, PLR; platelet/lymphocyte ratio, MPV; mean platelet volume, RDW; red cell distribution width, CI; confidence Interval. p values < 0.05 were considered statistically significant.

R:0.291, R<sup>2</sup>:0.085, adjusted R<sup>2</sup>:0.053, standard error of the estimate: 2.02438

$F(10, 289) = 2.683, p:0.004$
